# Supplementary material
Source: PubMed Central journal article supplement (PMC6086697)
Supplement: CJN.10180917SupplementaryData.pdf [file CJN.10180917SupplementaryData.pdf]

Supplemental material is neither peer-reviewed nor thoroughly edited by CJASN. The authors alone are responsible for the accuracy and presentation of the material.

Supplementary Table 1.

|                        | HHD Direct Hours<br>from Bearingpoint<br>Report | Conversion Factor<br>(Direct Hours to<br>FTE) from Komenda<br>et al. (KI, 2010) | <b>Home Hemodialysis<br/>(HHD) FTE from<br/>Komenda et al. (KI,<br/>2010)<br/>(Direct Hours x<br/>Conversion Factor)</b> | Facility HD Direct<br>Hours from<br>Bearingpoint Report | <b>Facility HD FTE</b> | PD Direct Hours<br>from Bearingpoint<br>Report | <b>PD FTE</b> |
|------------------------|-------------------------------------------------|---------------------------------------------------------------------------------|--------------------------------------------------------------------------------------------------------------------------|---------------------------------------------------------|------------------------|------------------------------------------------|---------------|
| Registered Nurse       | 11.8                                            | 950                                                                             | <b>0.0124</b>                                                                                                            | 208                                                     | <b>0.2189</b>          | 20.56                                          | <b>0.0216</b> |
| Clerk                  | 6                                               | 1000                                                                            | <b>0.0060</b>                                                                                                            | 26                                                      | <b>0.0260</b>          | 6.61                                           | <b>0.0066</b> |
| Renal Technician / LPN | 0                                               | 950                                                                             | <b>0.0000</b>                                                                                                            | 130                                                     | <b>0.1368</b>          | 0                                              | <b>0.0000</b> |
| Dietician              | 7.2                                             | 1000                                                                            | <b>0.0072</b>                                                                                                            | 8.7                                                     | <b>0.0087</b>          | 6                                              | <b>0.0060</b> |
| Dialysis Technician    | 24.6                                            | 950                                                                             | <b>0.0259</b>                                                                                                            | N/A                                                     | <b>0.0086*</b>         | 0                                              | <b>0.0000</b> |
| Clinical Pharmacist    | 4.3                                             | 625                                                                             | <b>0.0069</b>                                                                                                            | 2.1                                                     | <b>0.0034</b>          | 1.65                                           | <b>0.0026</b> |
| Social Worker          | 5.7                                             | 1150                                                                            | <b>0.0050</b>                                                                                                            | 6.9                                                     | <b>0.0060</b>          | 4.59                                           | <b>0.0040</b> |

\*0.86 Biomedical Technician Hours per 1000 Patients Years for In-Centre Dialysis Patients of any Acuity (Bearingpoint Report)
